# Supplementary material for: Rapid catalytic reduction of environmentally toxic azo dye pollutant by Prussian blue analogue nanocatalyst
Source: Royal Society of Chemistry journal article supplement (doi:10.1039/d3ra07806j), 2024-01-01
Supplement: d3ra07806j1.pdf [file d3ra07806j1.pdf]

## Rapid Catalytic Reduction of Environmentally Toxic Azo Dye Pollutant by Prussian Blue Analogue Nanocatalyst

Dina A. El Mously<sup>a</sup>, Amr M. Mahmoud<sup>a\*</sup>, Mohammed M. Goma<sup>b</sup>, Hend Z. Yamani<sup>c\*</sup>

### Supplementary Material

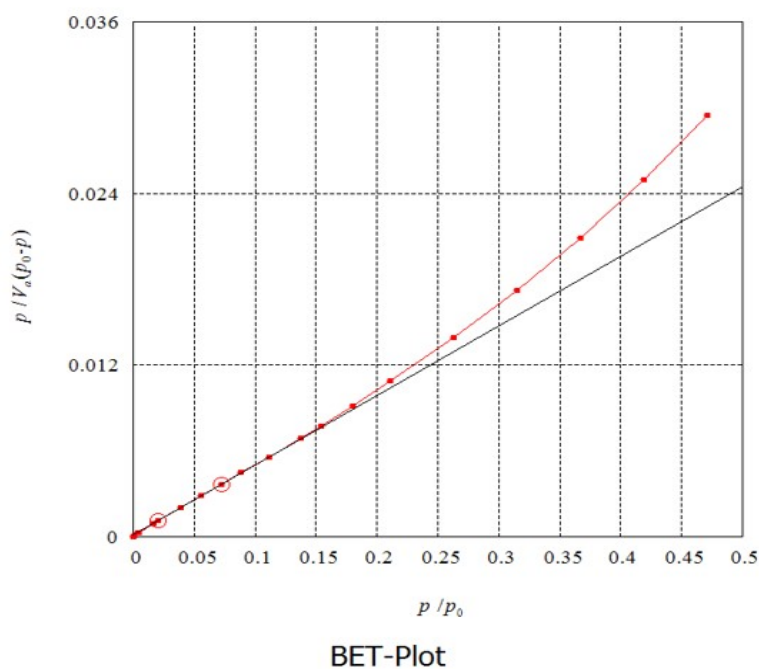

**Figure S1:** The BET plot for the prepared PBA ( $\text{Cu}_3[\text{Co}(\text{CN})_6]_2$ )

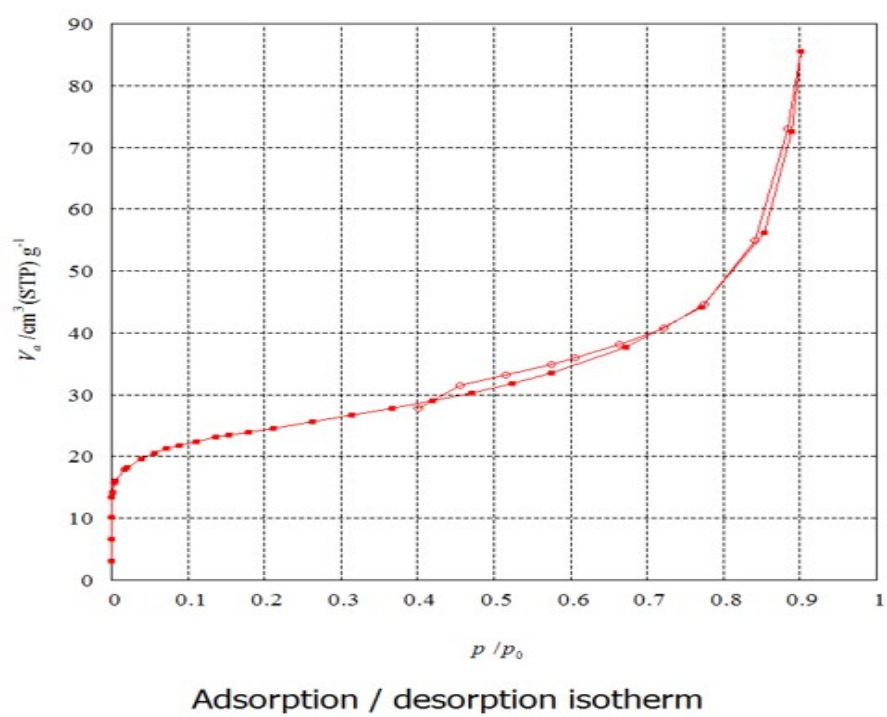

**Figure S2:** The adsorption/desorption isotherm plot for the prepared PBA ( $\text{Cu}_3[\text{Co}(\text{CN})_6]_2$ )

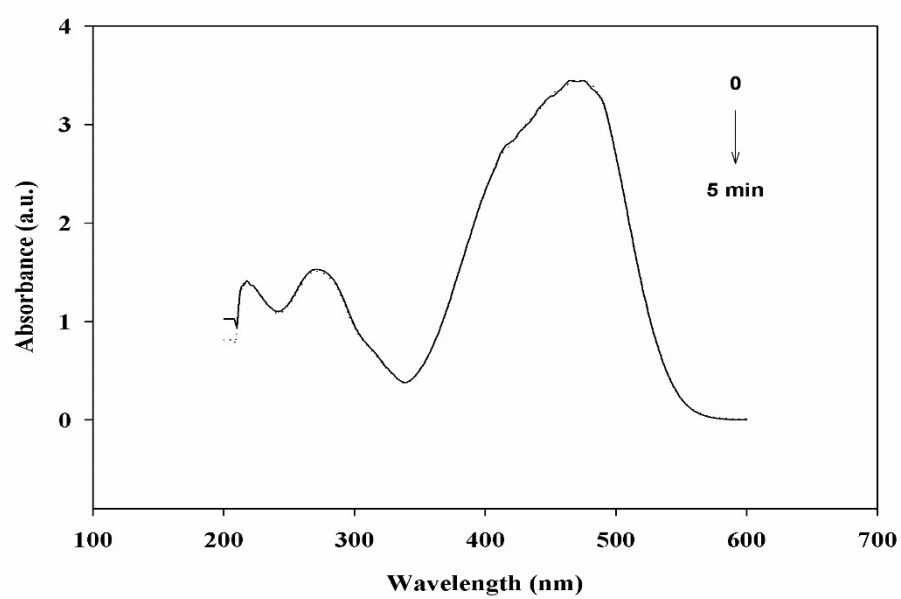

**Figure S3:** UV–VIS spectra for the reduction of MO by PBA ( $\text{Cu}_3[\text{Co}(\text{CN})_6]_2$ ) without using  $\text{NaBH}_4$ .
